# Supplementary material
Source: ML conference proceedings conference paper supplement (https://proceedings.neurips.cc/paper_files/paper/2023/hash/868f2f9a9950f7b0538b3ce7eb4c8eb8-Abstract.html)
Supplement: Supplementary file 1 [file 868f2f9a9950f7b0538b3ce7eb4c8eb8-Supplemental-Conference.pdf]

## A Nyström Estimator Error bound

Nyström estimator can easily approximate the kernel mean embedding  $\psi_{p_1}, \psi_{p_2}$  as well as the MMD distance between two distribution density  $p_1$  and  $p_2$ . We need first assume the boundedness of the feature map to the kernel  $k$ :

**Assumption 2.** *There exists a positive constant  $K \leq \infty$  such that  $\sup_{x \in \mathcal{X}} \|\phi(x)\| \leq K$*

The true MMD distance between  $p_1$  and  $p_2$  is denoted as  $\text{MMD}(p_1, p_2)$ . The estimated MMD distance when using a Nyström sample size  $n_i$ , sub-sample size  $m_i$  for  $p_i$  respectively, is denoted as  $\text{MMD}_{(p_i, m_i, n_i)}$ . Then the error

$$\text{Err}_{(p_i, n_i, m_i)} := |\text{MMD}(p_1, p_2) - \text{MMD}_{(p_i, m_i, n_i)}|$$

and now we have the lemma from Theorem 5.1 in [8]

**Lemma 1.** *Let Assumption 2 hold. Furthermore, assume that for  $i \in 1, 2$ , the data points  $X_1^i, \dots, X_{n_i}^i$  are drawn i.i.d. from the distribution  $\rho_i$  and that  $m_i \leq n_i$  sub-samples  $\tilde{X}_1^i, \dots, \tilde{X}_{m_i}^i$  are drawn uniformly with replacement from the dataset  $\{X_1^i, \dots, X_{n_i}^i\}$ . Then, for any  $\delta \in (0, 1)$ , it holds with probability at least  $1 - 2\delta$*

$$\text{Err}_{(p_i, n_i, m_i)} \leq \sum_{i=1,2} \left( \frac{c_1}{\sqrt{n_i}} + \frac{c_2}{m_i} + \frac{\sqrt{\log(m_i/\delta)}}{m_i} \sqrt{\mathcal{N}^{p_i} \left( \frac{12K^2 \log(m_i/\delta)}{m_i} \right)} \right),$$

provided that, for  $i \in \{1, 2\}$ ,

$$m_i \geq \max(67, 12K^2 \|C_i\|_{\mathcal{L}(\mathcal{H})}^{-1}) \log(m_i/\delta)$$

where  $c_1 = 2K \sqrt{2 \log(6/\delta)}$ ,  $c_2 = 4\sqrt{3}K \log(12/\delta)$  and  $c_4 = 6K \sqrt{\log(12/\delta)}$ . The notation  $\mathcal{N}^{p_i}$  denotes the effective dimension associated to the distribution  $p_k$ .

Specifically, when the effective dimension  $\mathcal{N}$  satisfies, for some  $c \geq 0$ ,

- either  $\mathcal{N}^{\rho_i}(\sigma^2) \leq c\sigma^{2-\gamma}$  for some  $\gamma \in (0, 1)$ ,
- or  $\mathcal{N}^{\rho_i}(\sigma^2) \leq \log(1 + c/\sigma^2)/\beta$ , for some  $\beta > 0$ .

Then, choosing the subsample size  $m$  to be

- $m_i = n_i^{1/(2-\gamma)} \log(n_i/\delta)$  in the first case
- or  $m_i = \sqrt{n_i} \log(\sqrt{n_i} \max(1/\delta, c/(6K^2)))$  in the second case,

we get  $\text{Err}_{(\rho_i, n_i, m_i)} = O(1/\sqrt{n_i})$

## B Proofs of Section 4

### B.1 Exact kernel uncertainty $\mathcal{GP}$ formulating

Following the same notation in Section 4, now we can construct a Gaussian process  $\mathcal{GP}(0, \hat{k})$  modelling functions over  $\mathcal{P}$ . This  $\mathcal{GP}$  model can then be applied to learn  $\hat{f}$  from a given set of observations  $\mathcal{D}_n = \{(P_i, y_i)\}_{i=1}^n$ . Under zero mean condition, the value of  $\hat{f}(P_*)$  for a given  $P_* \in \mathcal{P}$  follows a Gaussian posterior distribution with

$$\hat{\mu}_n(P_*) = \hat{\mathbf{k}}_n(P_*)^T (\hat{\mathbf{K}}_n + \sigma^2 \mathbf{I})^{-1} \mathbf{y}_n \quad (21)$$

$$\hat{\sigma}_n^2(P_*) = \hat{k}(P_*, P_*) - \hat{\mathbf{k}}_n(P_*)^T (\hat{\mathbf{K}}_n + \sigma^2 \mathbf{I})^{-1} \hat{\mathbf{k}}_n(P_*), \quad (22)$$

where  $\mathbf{y}_n := [y_1, \dots, y_n]^T$ ,  $\hat{\mathbf{k}}_n(P_*) := [\hat{k}(P_*, P_1), \dots, \hat{k}(P_*, P_n)]^T$  and  $[\hat{\mathbf{K}}_n]_{ij} = \hat{k}(P_i, P_j)$ .

Now we restrict our Gaussian process in the subspace  $\mathcal{P}_{\mathcal{X}} = \{P_x, x \in \mathcal{X}\} \subset \mathcal{P}$ . We assume the observation  $y_i = f(x_i) + \zeta_i$  with the noise  $\zeta_i$ . The input-induced noise is defined as  $\Delta f_{P_{x_i}} := f(x_i) - \mathbb{E}_{P_{x_i}}[f] = f(x_i) - \hat{f}(P_{x_i})$ . Then the total noise is  $y_i - \mathbb{E}_{P_{x_i}}[f] = \zeta_i + \Delta f_{P_{x_i}}$ . To formulate the regret bounds, we introduce the information gain given any  $\{P_t\}_{t=1}^n \subset \mathcal{P}$ :

$$\hat{I}(\mathbf{y}_n; \hat{\mathbf{f}}_n | \{P_t\}_{t=1}^n) := \frac{1}{2} \ln \det(\mathbf{I} + \sigma^{-2} \hat{\mathbf{K}}_n), \quad (23)$$

and the maximum information gain is defined as  $\hat{\gamma}_n := \sup_{\mathcal{R} \in \mathcal{P}_{\mathcal{X}}; |\mathcal{R}|=n} \hat{I}(\mathbf{y}_n; \hat{\mathbf{f}}_n | \mathcal{R})$ . Here  $\hat{\mathbf{f}}_n := [\hat{f}(p_1), \dots, \hat{f}(p_n)]^T$ .

We define the sub-Gaussian condition as follows:

**Definition 1.** For a given  $\sigma_{\xi} > 0$ , a real-valued random variable  $\xi$  is said to be  $\sigma_{\xi}$ -sub-Gaussian if:

$$\forall \lambda \in \mathbb{R}, \mathbb{E}[e^{\lambda \xi}] \leq e^{\lambda^2 \sigma_{\xi}^2 / 2} \quad (24)$$

Now we can state the lemma for bounding the uncertain-inputs regret of exact kernel evaluations, which is originally stated in Theorem 5 in [25].

**Lemma 2.** Let  $\delta \in (0, 1)$ ,  $f \in \mathcal{H}_k$ , and the corresponding  $\|f\|_{\hat{k}} \leq b$ . Suppose the observation noise  $\zeta_i = y_i - f(x_i)$  is conditionally  $\sigma_{\zeta}$ -sub-Gaussian. Assume that both  $k$  and  $P_x$  satisfy the conditions for  $\Delta f_{P_x}$  to be  $\sigma_E$ -sub-Gaussian, for a given  $\sigma_E > 0$ . Then, we have the following results:

• The following holds for all  $x \in \mathcal{X}$  and  $t \geq 1$ :

$$|\hat{\mu}_n(P_x) - \hat{f}(P_x)| \leq \left( b + \sqrt{\sigma_E^2 + \sigma_{\zeta}^2} \sqrt{2 \left( \hat{I}(\mathbf{y}_n; \hat{\mathbf{f}}_n | \{P_t\}_{t=1}^n) + 1 + \ln(1/\delta) \right)} \right) \hat{\sigma}_n(P_x) \quad (25)$$

• Running with upper confidence bound (UCB) acquisition function  $\alpha(x | \mathcal{D}_n) = \hat{\mu}_n(P_x) + \hat{\beta}_n \hat{\sigma}_n(P_x)$  where

$$\hat{\beta}_n = b + \sqrt{\sigma_E^2 + \sigma_{\zeta}^2} \sqrt{2 \left( \hat{I}(\mathbf{y}_n; \hat{\mathbf{f}}_n | \{P_t\}_{t=1}^n) + 1 + \ln(1/\delta) \right)}, \quad (26)$$

and set  $\sigma^2 = 1 + 2/n$ , the uncertain-inputs cumulative regret satisfies:

$$\hat{R}_n \in O(\sqrt{n \hat{\gamma}_n} (b + \sqrt{\hat{\gamma}_n + \ln(1/\delta)})) \quad (27)$$

with probability at least  $1 - \delta$ .

Note that although the original theorem restricted to the case when  $\hat{k}(p, q) = \langle \psi_P, \psi_Q \rangle_k$ , the results can be easily generated to other kernels over  $\mathcal{P}$ , as long as its universal w.r.t  $C(\mathcal{P})$  given that  $\mathcal{X}$  is compact and the mean map  $\psi$  is injective [11, 21].

## B.2 Error estimates for inexact kernel approximation

Now let us derivative the inference under the introduce of inexact kernel estimations.

**Theorem 2.** Under the Assumption 1 for  $\varepsilon > 0$ , let  $\tilde{\mu}_n, \tilde{\sigma}_n, \tilde{I}(\mathbf{y}_n; \hat{\mathbf{f}}_n | \{P_t\}_{t=1}^n)$  as defined in (14), (15), (16) respectively, and  $\hat{\mu}_n, \hat{\sigma}_n, \hat{I}(\mathbf{y}_n; \hat{\mathbf{f}}_n | \{P_t\}_{t=1}^n)$  as defined in (21), (22), (23). Assume  $\max_{x \in \mathcal{X}} f(x) = M$ , and assume the observation error  $\zeta_i = y_i - f(x_i)$  satisfies  $|\zeta_i| < A$  for all  $i$ . Then we have the following error bound holds with probability at least  $1 - \varepsilon$ :

$$|\hat{\mu}_n(P_*) - \tilde{\mu}_n(P_*)| < \left( \frac{n}{\sigma^2} + \frac{n^2}{\sigma^4} \right) (M + A) e_{\varepsilon} + O(e_{\varepsilon}^2) \quad (28)$$

$$|\hat{\sigma}_n^2(P_*) - \tilde{\sigma}_n^2(P_*)| < \left( 1 + \frac{n}{\sigma^2} \right)^2 e_{\varepsilon} + O(e_{\varepsilon}^2) \quad (29)$$

$$\left| \tilde{I}(\mathbf{y}_n; \hat{\mathbf{f}}_n | \{P_t\}_{t=1}^n) - \hat{I}(\mathbf{y}_n; \hat{\mathbf{f}}_n | \{P_t\}_{t=1}^n) \right| < \frac{n^{3/2}}{2\sigma^2} e_{\varepsilon} + O(e_{\varepsilon}^2) \quad (30)$$

*Proof.* Denote  $e(P_*, Q) = \hat{k}(P_*, Q) - \hat{k}(P_*, P_*)$ ,  $\mathbf{e}_n(P_*) = [e(P_*, P_1), \dots, e(P_*, P_n)]^T$ , and  $[\mathbf{E}_n]_{i,j} = e(P_i, P_j)$ . Now according to the matrix inverse perturbation expansion,

$$(X + \delta X)^{-1} = X^{-1} - X^{-1} \delta X X^{-1} + O(\|\delta X\|^2),$$

we have

$$(\hat{\mathbf{K}}_n + \sigma^2 \mathbf{I} + \mathbf{E}_n)^{-1} = (\hat{\mathbf{K}}_n + \sigma^2 \mathbf{I})^{-1} - (\hat{\mathbf{K}}_n + \sigma^2 \mathbf{I})^{-1} \mathbf{E}_n (\hat{\mathbf{K}}_n + \sigma^2 \mathbf{I})^{-1} + O(\|\mathbf{E}_n\|^2),$$

thus

$$\tilde{\mu}_n(P_*) = (\hat{\mathbf{k}}_n(P_*) + \mathbf{e}_n(P_*))^T (\hat{\mathbf{K}}_n + \sigma^2 \mathbf{I} + \mathbf{E}_n)^{-1} \mathbf{y}_n \quad (31)$$

$$= \hat{\mu}_n(P_*) + \mathbf{e}_n(P_*)^T (\hat{\mathbf{K}}_n + \sigma^2 \mathbf{I})^{-1} \mathbf{y}_n - \hat{\mathbf{k}}_n(P_*)^T (\hat{\mathbf{K}}_n + \sigma^2 \mathbf{I})^{-1} \mathbf{E}_n (\hat{\mathbf{K}}_n + \sigma^2 \mathbf{I})^{-1} \mathbf{y}_n \quad (32)$$

$$+ O(\|\mathbf{E}_n\|^2) + O(\|\mathbf{e}_n(P_*)\| \cdot \|\mathbf{E}_n\|) \quad (33)$$

$$\tilde{\sigma}_n^2(P_*) = \hat{\sigma}_n^2(P_*) + e(P_*, P_*) - (\hat{\mathbf{k}}_n(P_*) + \mathbf{e}_n(P_*))^T (\hat{\mathbf{K}}_n + \sigma^2 \mathbf{I} + \mathbf{E}_n)^{-1} (\hat{\mathbf{k}}_n(P_*) + \mathbf{e}_n(P_*)) \quad (34)$$

$$= \hat{\sigma}_n^2(P_*) + e(P_*, P_*) - 2\mathbf{e}_n(P_*)^T (\hat{\mathbf{K}}_n + \sigma^2 \mathbf{I})^{-1} \hat{\mathbf{k}}_n(P_*) + \hat{\mathbf{k}}_n(P_*)^T (\hat{\mathbf{K}}_n + \sigma^2 \mathbf{I})^{-1} \mathbf{E}_n (\hat{\mathbf{K}}_n + \sigma^2 \mathbf{I})^{-1} \hat{\mathbf{k}}_n(P_*) \quad (35)$$

$$+ O(\|\mathbf{E}_n\|^2) + O(\|\mathbf{e}_n\| \cdot \|\mathbf{E}_n\|) + O(\|\mathbf{e}_n\|^2 \cdot \|\mathbf{E}_n\|) \quad (36)$$

Notic that the following holds with a probability at least  $1 - \varepsilon$ ,

$$\|\mathbf{e}_n(P_*)^T (\hat{\mathbf{K}}_n + \sigma^2 \mathbf{I})^{-1} \mathbf{y}_n\| \leq \|\mathbf{e}_n(P_*)\|_2 \|(\hat{\mathbf{K}}_n + \sigma^2 \mathbf{I})^{-1}\|_2 \|\mathbf{y}_n\|_2 \leq \frac{n}{\sigma^2} (M + A) e_\varepsilon, \quad (37)$$

461

$$\|\hat{\mathbf{k}}_n(P_*)^T (\hat{\mathbf{K}}_n + \sigma^2 \mathbf{I})^{-1} \mathbf{E}_n (\hat{\mathbf{K}}_n + \sigma^2 \mathbf{I})^{-1} \mathbf{y}_n\| \leq \|\hat{\mathbf{k}}_n(P_*)\|_2 \|(\hat{\mathbf{K}}_n + \sigma^2 \mathbf{I})^{-1}\|_2^2 \|\mathbf{E}_n\|_2 \|\mathbf{y}_n\|_2 \quad (38)$$

$$\leq \sqrt{n} \sigma^{-4} n e_\varepsilon \sqrt{n} (M + A) = \frac{n^2}{\sigma^4} (M + A), \quad (39)$$

here we use the fact that  $\hat{\mathbf{K}}_n$  semi-definite (which means  $\|(\hat{\mathbf{K}}_n + \sigma^2 \mathbf{I})^{-1}\|_2 \leq \sigma^{-2}$ ),  $\hat{k}(P_*, P_*) \leq 1$ ,  $|y_i| \leq M + A$ . Combining these results, we have that

$$|\tilde{\mu}_n(P_*) - \hat{\mu}_n(P_*)| < (\frac{n}{\sigma^2} + \frac{n^2}{\sigma^4}) (M + A) e_\varepsilon + O(e_\varepsilon^2),$$

holds with a probability at least  $1 - \varepsilon$ .

Similarly, we can conduct the same estimation to  $\mathbf{e}_n(P)^T (\hat{\mathbf{K}}_n + \sigma^2 \mathbf{I})^{-1} \hat{\mathbf{k}}_n(P_*)$  and  $\hat{\mathbf{k}}_n(P)^T (\hat{\mathbf{K}}_n + \sigma^2 \mathbf{I})^{-1} \mathbf{E}_n (\hat{\mathbf{K}}_n + \sigma^2 \mathbf{I})^{-1} \hat{\mathbf{k}}_n(P_*)$ , and get

$$|\tilde{\sigma}_n^2(P_*) - \hat{\sigma}_n^2(P_*)| < (1 + \frac{n}{\sigma^2})^2 e_\varepsilon + O(e_\varepsilon^2)$$

holds with a probability at least  $1 - \varepsilon$ .

It remains to estimate the error for estimating the information gain. Notice that, with a probability at least  $1 - \varepsilon$ ,

$$\left| \tilde{I}(\mathbf{y}_n; \hat{\mathbf{f}}_n | \{p_t\}_{t=1}^n) - \hat{I}(\mathbf{y}_n; \hat{\mathbf{f}}_n | \{p_t\}_{t=1}^n) \right| = \left| \frac{1}{2} \log \frac{\det(\mathbf{I} + \sigma^{-2} \tilde{\mathbf{K}}_n)}{\det(\mathbf{I} + \sigma^{-2} \hat{\mathbf{K}}_n)} \right| \quad (40)$$

$$= \left| \frac{1}{2} \log \det(\mathbf{I} - (\sigma^2 \mathbf{I} + \hat{\mathbf{K}}_n)^{-1} \mathbf{E}_n) \right| \quad (41)$$

$$= \left| \frac{1}{2} \text{Tr}(\log(\mathbf{I} - (\sigma^2 \mathbf{I} + \hat{\mathbf{K}}_n)^{-1} \mathbf{E}_n)) \right| \quad (42)$$

$$= \left| \frac{1}{2} \text{Tr}(-(\sigma^2 \mathbf{I} + \hat{\mathbf{K}}_n)^{-1} \mathbf{E}_n) + O(\|\mathbf{E}_n\|^2) \right| \quad (43)$$

$$\leq \frac{n^{3/2}}{2\sigma^2} e_\varepsilon + O(\|\mathbf{E}_n\|^2), \quad (44)$$

here the second equation uses the fact that  $\det(AB^{-1}) = \det(A) \det(B)^{-1}$ , and the third and fourth equations use  $\log \det(I + A) = \text{Tr} \log(I + A) = \text{Tr}(A - \frac{A^2}{2} + \dots)$ . The last inequality follows from the fact

$$\text{Tr}(\sigma^2 \mathbf{I} + \hat{\mathbf{K}}_n)^{-1} \mathbf{E}_n \leq \|(\sigma^2 \mathbf{I} + \hat{\mathbf{K}}_n)^{-1}\|_F \|\mathbf{E}_n\|_F \leq n^{3/2} \sigma^{-2} e_\varepsilon$$

466 and  $\hat{\mathbf{K}}_n$  is semi-definite. □

467 With the uncertainty bound given by Lemma 2, let us prove that under inexact kernel estimations, the  
468 posterior mean is concentrated around the unknown reward function  $\hat{f}$

469 **Theorem 3.** *Under the former setting as in Theorem 2, with probability at least  $1 - \delta - \varepsilon$ , let*  
470  $\sigma_\nu = \sqrt{\sigma_\zeta^2 + \sigma_E^2}$ , *taking  $\sigma = 1 + \frac{2}{n}$ , the following holds for all  $x \in \mathcal{X}$ :*

$$|\tilde{\mu}_n(P_x) - \hat{f}(P_x)| \leq \tilde{\beta}_n \tilde{\sigma}_n(P_x) + \left( \tilde{\beta}_n(1+n) + \tilde{\sigma}_n(P_x) \sigma_\nu n^{3/4} \right) e_\varepsilon^{1/2} + (n+n^2)(M+A)e_\varepsilon, \quad (45)$$

$$\text{where } \tilde{\beta}_n = \left( b + \sigma_\nu \sqrt{2(\tilde{I}(\mathbf{y}_n; \hat{\mathbf{f}}_n | \{P_t\}_{t=1}^n) - \ln(\delta) + 1)} \right) \quad (46)$$

471 *Proof.* According to Lemma 2, equation (25), we have

$$|\hat{\mu}_n(P_x) - \hat{f}(P_x)| \leq \hat{\beta}_n \hat{\sigma}_n(P_x) \quad (47)$$

472 with

$$\hat{\beta}_n = b + \sigma_\nu \sqrt{2 \left( \hat{I}(\mathbf{y}_n; \hat{\mathbf{f}}_n | \{P_t\}_{t=1}^n) + 1 + \ln(1/\delta) \right)}. \quad (48)$$

473 Notice that

$$|\tilde{\mu}_n(P_x) - \hat{f}(P_x)| \leq |\tilde{\mu}_n(P_x) - \hat{\mu}_n(P_x)| + |\hat{\mu}_n(P_x) - \hat{f}(P_x)|, \quad (49)$$

$$\hat{\beta}_n = b + \sigma_\nu \sqrt{2 \left( \hat{I}(\mathbf{y}_n; \hat{\mathbf{f}}_n | \{P_t\}_{t=1}^n) + 1 + \ln(1/\delta) \right)} \quad (50)$$

$$\leq b + \sigma_\nu \sqrt{2 \left( \tilde{I}(\mathbf{y}_n; \hat{\mathbf{f}}_n | \{P_t\}_{t=1}^n) + \frac{n^{3/2}}{2} e_\varepsilon + 1 + \ln(1/\delta) \right)} \quad (51)$$

$$\leq b + \sigma_\nu \sqrt{2 \left( \tilde{I}(\mathbf{y}_n; \hat{\mathbf{f}}_n | \{P_t\}_{t=1}^n) + 1 + \ln(1/\delta) \right)} + \sigma_\nu n^{3/4} e_\varepsilon^{1/2} \quad (52)$$

474 where the second inequality follows from Theorem 2, (30), and the third inequality follows from the  
475 inequality  $\sqrt{a_1 + a_2} \leq \sqrt{a_1} + \sqrt{a_2}$ ,  $a_1 > 0$ ,  $a_2 > 0$ .

476 We also have (29), which means

$$\hat{\sigma}_n(P_x) = \sqrt{\hat{\sigma}_n(P_x)^2} \leq \sqrt{\tilde{\sigma}_n(P_x)^2 + (1+n)^2 e_\varepsilon} \leq \tilde{\sigma}_n(P_x) + (1+n) e_\varepsilon^{1/2}, \quad (53)$$

477 combining (28), (49), (50) and (53), we finally get the result in (45). □

### 479 B.3 Proofs for Theorem 1

480 Now we can prove our main theorem 1.

481 *Proof of Theorem 1.* Let  $x^*$  maximize  $\hat{f}(P_x)$  over  $\mathcal{X}$ . Observing that at each round  $n \geq 1$ , by the  
482 choice of  $x_n$  to maximize the aquisition function  $\tilde{\alpha}(x | \mathcal{D}_{n-1}) = \tilde{\mu}_{n-1}(P_x) + \tilde{\beta}_{n-1} \tilde{\sigma}_{n-1}(P_x)$ , we  
483 have

$$\tilde{r}_n = \hat{f}(P_{x^*}) - \hat{f}(P_{x_n}) \quad (54)$$

$$\leq \tilde{\mu}_{n-1}(P_{x^*}) + \tilde{\beta}_{n-1}\tilde{\sigma}_{n-1}(P_{x^*}) - \tilde{\mu}_{n-1}(P_{x_n}) + \tilde{\beta}_{n-1}\tilde{\sigma}_{n-1}(P_{x_n}) + 2Err(n-1, e_\varepsilon) \quad (55)$$

$$\leq 2\tilde{\beta}_{n-1}\tilde{\sigma}_{n-1}(P_{x_n}) + 2Err(n-1, e_\varepsilon). \quad (56)$$

484 Here we denote  $Err(n, e_\varepsilon) := \left( \tilde{\beta}_n(1+n) + \tilde{\sigma}_n(P_x)\sigma_\nu n^{3/4} \right) e_\varepsilon^{1/2} + (n+n^2)(M+A)e_\varepsilon$ . The  
 485 second inequality follows from (45),

$$\hat{f}(P_{x^*}) - \tilde{\mu}_{n-1}(P_{x^*}) \leq \tilde{\beta}_{n-1}\tilde{\sigma}_{n-1}(P_{x^*}) + Err(n-1, e_\varepsilon) \quad (57)$$

$$\tilde{\mu}_{n-1}(P_{x_n}) - \hat{f}(P_{x_n}) \leq \tilde{\beta}_{n-1}\tilde{\sigma}_{n-1}(P_{x_n}) + Err(n-1, e_\varepsilon), \quad (58)$$

and the third inequality follows from the choice of  $x_n$ :

$$\tilde{\mu}_{n-1}(P_{x^*}) + \tilde{\beta}_{n-1}\tilde{\sigma}_{n-1}(P_{x^*}) \leq \tilde{\mu}_{n-1}(P_{x_n}) + \tilde{\beta}_{n-1}\tilde{\sigma}_{n-1}(P_{x_n}).$$

486 Thus we have

$$\tilde{R}_n = \sum_{t=1}^n \tilde{r}_t \leq 2\tilde{\beta}_n \sum_{t=1}^n \tilde{\sigma}_{t-1}(P_{x_t}) + \sum_{t=1}^T Err(t-1, e_\varepsilon). \quad (59)$$

From Lemma 4 in [9], we have that

$$\sum_{t=1}^n \tilde{\sigma}_{t-1}(P_{x_t}) \leq \sqrt{4(n+2) \ln \det(I + \sigma^{-2}\tilde{K}_n)} \leq \sqrt{4(n+2)\tilde{\gamma}_n},$$

and thus

$$2\tilde{\beta}_n \sum_{t=1}^n \tilde{\sigma}_{t-1}(P_{x_t}) = O\left(\sqrt{n\tilde{\gamma}_n} + \sqrt{n\tilde{\gamma}_n(\tilde{\gamma}_n - \ln \delta)}\right).$$

On the other hand, notice that

$$\sum_{t=1}^n Err(t-1, e_\varepsilon) = O\left((\sqrt{\tilde{\gamma}_n}n^2 + n^{7/4})e_\varepsilon + (n^2 + n^3)e_\varepsilon\right),$$

487 we immediately get the result.  $\square$

## 488 C Evaluation Details

### 489 C.1 Implementation

490 In our implementation of AIRBO, we design the kernel  $k$  used for MMD estimation to be a linear  
 491 combination of multiple Rational Quadratic kernels as its long tail behavior circumvents the fast  
 492 decay issue of kernel [6]:

$$k(x, x') = \sum_{a_i \in \{0.2, 0.5, 1, 2, 5\}} \left(1 + \frac{(x - x')^2}{2a_i l_i^2}\right)^{-a_i}, \quad (60)$$

493 where  $l_i$  is a learnable lengthscale and  $a_i$  determines the relative weighting of large-scale and  
 494 small-scale variations.

495 Depending on the form of input distributions, the sampling and sub-sampling sizes for Nyström  
 496 MMD estimator are empirically selected via experiments. Moreover, as the input uncertainty is  
 497 already modeled in the surrogate, we employ a classic UCB-based acquisition as Eq. 5 with  $\beta = 2.0$   
 498 and maximize it via an L-BFGS-B optimizer.

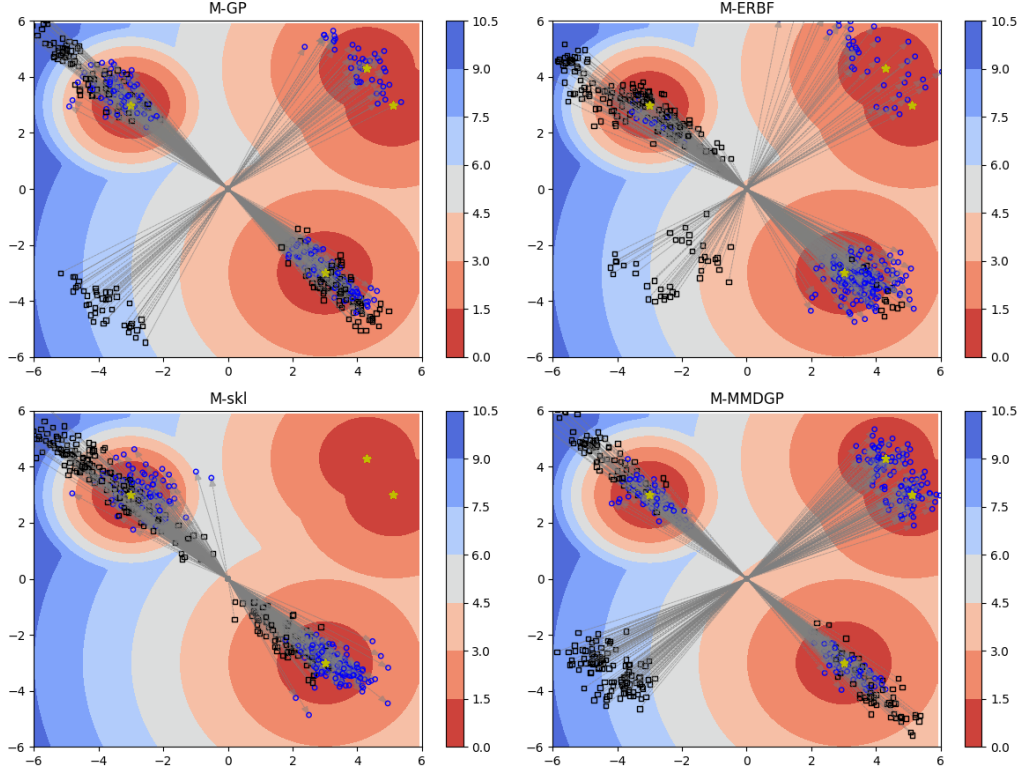

Figure 7: Simulation results of the push configurations found by different algorithms.

## 499 C.2 Supplementary Experiments

500 **Robust Robot Pushing:** This benchmark is based on a Box2D simulator from [30], where our  
 501 objective is to identify a robust push configuration, enabling a robot to push a ball to predetermined  
 502 targets under input randomness. In our experiment, we simplify the task by setting the push angle to  
 503  $r_a = \arctan \frac{r_y}{r_x}$ , ensuring the robot is always facing the ball. Also, we intentionally define the input  
 504 distribution as a two-component Gaussian Mixture Model as follows:

$$(r_x, r_y, r_t) \sim GMM(\mu = \begin{bmatrix} 0 & 0 & 0 \\ -1 & 1 & 0 \end{bmatrix}, \Sigma = \begin{bmatrix} 0.1^2 & -0.3^2 & 1e-6 \\ -0.3^2 & 0.1^2 & 1e-6 \\ 1e-6 & 1e-6 & 1.0^2 \end{bmatrix}, w = \begin{bmatrix} 0.5 \\ 0.5 \end{bmatrix}),$$

505 where the covariance matrix  $\Sigma$  is shared among components and  $w$  is the weights of mixture  
 506 components. Figure 5b shows some example samples from this GMM distribution. Meanwhile, as  
 507 the SKL-UCB and ERBF-UCB surrogates can only accept Gaussian input distributions, we choose to  
 508 approximate the true input distribution with a Gaussian. As shown in Figure 5b, the approximation  
 509 error is obvious, which explains the performance gap among these algorithms in Figure 5c.

510 Apart from the statistics of the found pre-images in Figure 6, we also simulate the robot pushes  
 511 according to the found configurations and visualize the results in Figure 7. In this figure, each black  
 512 hollow square represents an instance of the robot's initial location, the grey arrow indicates the push  
 513 direction and duration, and the blue circle marks the ball's ending position after the push. We can  
 514 find that, as the GP-UCB ignores the input uncertainty, it randomly pushes to these targets and the  
 515 ball ending positions fluctuate. Also, due to the incorrect assumption of the input distribution, the  
 516 SKL-UCB and ERBF-UCB fail to control the ball's ending position under input randomness. On  
 517 the contrary, AIRBO successfully recognizes the twin targets in quadrant I as an optimal choice  
 518 and frequently pushes to this area. Moreover, all the ball's ending positions are well controlled and  
 519 centralized around the targets under input randomness.
